# Supplementary material for: Insights into the Adolescent Cystic Fibrosis Airway Microbiome Using Shotgun Metagenomics
Source: MDPI journal article supplement (doi:10.3390/ijms25073893), 2024-03-31
Supplement: s1 [file s1]

**Table S1:** Agars used for approximate identification of listed bacteria

| <b>Bacteria</b>                                                                                                                                                                        | <b>Selective Agar</b>                                                                        | <b>Oxygenation</b> | <b>Time (h)</b> | <b>Temp</b> |
|----------------------------------------------------------------------------------------------------------------------------------------------------------------------------------------|----------------------------------------------------------------------------------------------|--------------------|-----------------|-------------|
| <i>P. aeruginosa</i>                                                                                                                                                                   | Cetrimide (Fannin)                                                                           | Aerobic            | 24              | 37°C        |
| <i>S. aureus</i>                                                                                                                                                                       | CHROMID® <i>S. aureus</i> Elite agar (SAIDE) and <i>S. aureus</i> agar (SAID) – (Biomérieux) | Aerobic            | 24              | 37°C        |
| <i>H. influenzae</i>                                                                                                                                                                   | Chocolate agar with Bacitracin (Fannin)                                                      | Anaerobic          | 24              | 37°C        |
| <i>S. maltophilia</i>                                                                                                                                                                  | Vancomycin, Imipenem & Amphotericin B Agar (VIA agar)                                        | Aerobic            | 48              | 37°C        |
| <i>A. baumannii</i>                                                                                                                                                                    | CHROMagar™ Acinetobacter                                                                     | Aerobic            | 48              | 37°C        |
| <i>E. coli</i> , <i>Enterococcus</i> , <i>Klebsiella</i> , <i>Enterobacter</i> , <i>Citrobacter</i> , <i>Proteus</i> , <i>Pseudomonas</i> , <i>S. aureus</i> , <i>S. saprophyticus</i> | CHROMagar™ Orientation                                                                       | Aerobic            | 24              | 37°C        |
