# Supplementary material for: Insights into the Adolescent Cystic Fibrosis Airway Microbiome Using Shotgun Metagenomics
Source: MDPI journal article supplement (doi:10.3390/ijms25073893), 2024-03-31
Supplement: s1 [file s1]

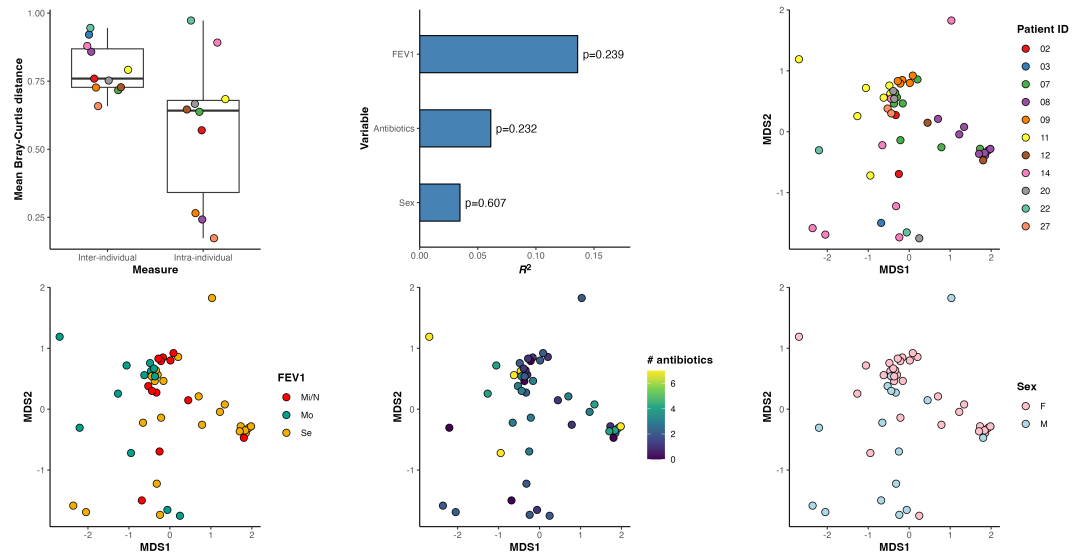

**Figure S2: Beta-diversity analysis.** (A) Bray-Curtis distances between samples. (B) PERMANOVA results. MDS plots coloured by (C) patient ID, (D) FEV1, (E) number of antibiotics, and (F) sex.
